# Supplementary material for: Systematic Survey of Vibrio spp. and Salmonella spp. in Bivalve Shellfish in Apulia Region (Italy): Prevalence and Antimicrobial Resistance
Source: MDPI journal article supplement (doi:10.3390/microorganisms11020450), 2023-02-10
Supplement: s1 [file s1]

**Table S1.** Information on *Vibrio* isolates: origin, resistance profile and MAR index.

| Sampling station | Matrix                           | Isolate ID   | <i>Vibrio</i> species      | Resistance pattern                 | MAR index |
|------------------|----------------------------------|--------------|----------------------------|------------------------------------|-----------|
| 1                | <i>Mytilus galloprovincialis</i> | 15518/2021-1 | <i>V. alginolyticus</i>    | FIS, AMP, FAZ                      | 0.096     |
|                  |                                  | 15518/2021-2 | <i>V. alginolyticus</i>    | FIS                                |           |
|                  |                                  | 21506/2021-1 | <i>V. alginolyticus</i>    | MERO, FIS, AMP, P/T4, PIP, FEP     | 0.193     |
|                  |                                  | 22287/2021-1 | <i>V. alginolyticus</i>    | FIS, AMP, PIP, FAZ, A/S2           | 0.161     |
|                  |                                  | 20616/2022-1 | <i>V. parahaemolyticus</i> | FIS, AMP, PIP, FAZ                 | 0.129     |
| 2                | <i>Mytilus galloprovincialis</i> | 20656/2021-1 | <i>V. alginolyticus</i>    | FIS, SXT, AMP, PIP, FAZ            | 0.161     |
|                  |                                  | 21507/2021-1 | <i>V. alginolyticus</i>    | FIS, AMP, PIP                      | 0.096     |
|                  |                                  | 22220/2021-1 | <i>V. alginolyticus</i>    | AMP, PIP, FAZ                      | 0.096     |
|                  |                                  | 37738/2021-1 | <i>V. harveyi</i>          | –                                  |           |
| 3                | <i>Crassostrea gigas</i>         | 15030/2021-1 | <i>V. alginolyticus</i>    | FIS, AMP, FAZ                      | 0.096     |
|                  |                                  | 20657/2021-1 | <i>V. alginolyticus</i>    | AMP, PIP                           | 0.064     |
|                  |                                  | 20657/2021-2 | <i>V. harveyi</i>          | AMP                                |           |
|                  |                                  | 21508/2021-1 | <i>V. alginolyticus</i>    | AMP                                |           |
|                  |                                  | 22221/2021-1 | <i>V. alginolyticus</i>    | FIS, AMP, P/T4, PIP, FAZ, TAZ, FEP | 0.225     |
|                  |                                  | 26755/2021-1 | <i>V. harveyi</i>          | AMP                                |           |
|                  |                                  | 37739/2021-1 | <i>V. alginolyticus</i>    | FIS, AMP, FAZ                      | 0.096     |
|                  |                                  | 37739/2021-2 | <i>V. harveyi</i>          | –                                  |           |
| 4                | <i>Mytilus galloprovincialis</i> | 16922/2022-2 | <i>V. alginolyticus</i>    | AMP                                |           |
|                  |                                  | 15517/2021-1 | <i>V. alginolyticus</i>    | AMP, FAZ                           | 0.064     |
|                  |                                  | 22288/2021-1 | <i>V. alginolyticus</i>    | FIS, AMP, FAZ                      | 0.096     |
|                  |                                  | 25806/2021-1 | <i>V. alginolyticus</i>    | AMP, FAZ                           | 0.064     |
|                  |                                  | 27218/2021-1 | <i>V. alginolyticus</i>    | FIS, AMP, PIP, FAZ                 | 0.129     |
| 5                | <i>Mytilus galloprovincialis</i> | 27218/2021-2 | <i>V. harveyi</i>          | FIS, AMP, PIP, FAZ                 | 0.129     |
|                  |                                  | 15026/2021-1 | <i>V. alginolyticus</i>    | AMP                                |           |
|                  |                                  | 17571/2021-1 | <i>V. alginolyticus</i>    | FIS, AMP, PIP, FAZ                 | 0.129     |
|                  |                                  | 17571/2021-2 | <i>V. alginolyticus</i>    | AMP, PIP, FAZ                      | 0.096     |
|                  |                                  | 20658/2021-1 | <i>V. parahaemolyticus</i> | AMP, PIP, FAZ                      | 0.096     |
|                  |                                  | 21570/2021-1 | <i>V. alginolyticus</i>    | AMP, PIP, FAZ                      | 0.096     |
|                  |                                  | 22222/2021-1 | <i>V. alginolyticus</i>    | FIS, AMP, PIP, FAZ                 | 0.129     |
|                  |                                  | 22222/2021-2 | <i>V. harveyi</i>          | –                                  |           |
| 6                | <i>Mytilus galloprovincialis</i> | 25803/2021-1 | <i>V. alginolyticus</i>    | –                                  |           |
|                  |                                  | 3891/2021-1  | <i>V. harveyi</i>          | AMP                                |           |
|                  |                                  | 14651/2021-1 | <i>V. harveyi</i>          | AMP                                |           |
|                  |                                  | 21168/2021-1 | <i>V. alginolyticus</i>    | FIS, AMP, PIP, FAZ                 | 0.129     |
|                  |                                  | 21249/2022-1 | <i>V. parahaemolyticus</i> | FIS, AMP, FAZ                      | 0.096     |
|                  |                                  | 24626/2022-1 | <i>V. parahaemolyticus</i> | FIS, AMP, PIP, FAZ                 | 0.129     |
|                  | <i>Ruditapes philippinarum</i>   | 14662/2021-1 | <i>V. alginolyticus</i>    | FIS, AMP, FAZ                      | 0.096     |
|                  |                                  | 17633/2021-1 | <i>V. alginolyticus</i>    | FIS, AMP, PIP, FAZ                 | 0.129     |
|                  |                                  | 21169/2021-1 | <i>V. alginolyticus</i>    | FIS, AMP, PIP, FAZ                 | 0.129     |
| 7                | <i>Crassostrea gigas</i>         | 21169/2021-2 | <i>V. parahaemolyticus</i> | FIS, AMP, FAZ                      | 0.096     |
|                  |                                  | 14672/2021-1 | <i>V. alginolyticus</i>    | AMP                                |           |
|                  |                                  | 20312/2021-1 | <i>V. harveyi</i>          | –                                  |           |
|                  |                                  | 21170/2021-1 | <i>V. parahaemolyticus</i> | AMP                                |           |
|                  |                                  | 21170/2021-2 | <i>V. alginolyticus</i>    | FIS                                |           |
| 9                |                                  | 26757/2021-1 | <i>V. harveyi</i>          | AMP, PIP                           | 0.064     |
|                  |                                  | 14683/2021-1 | <i>V. alginolyticus</i>    | FIS, AMP                           | 0.064     |

|    |                                        |              |                            |                    |       |
|----|----------------------------------------|--------------|----------------------------|--------------------|-------|
|    |                                        | 17187/2022-1 | <i>V. alginolyticus</i>    | FIS, AMP           | 0.064 |
|    | <i>Mytilus galloprovincialis</i>       | 19361/2022-1 | <i>V. parahaemolyticus</i> | FAZ                |       |
|    |                                        | 21250/2022-1 | <i>V. parahaemolyticus</i> | FAZ                |       |
|    |                                        | 24639/2022-1 | <i>V. parahaemolyticus</i> | FIS, AMP, PIP, FAZ | 0.129 |
|    |                                        | 25214/2022-1 | <i>V. parahaemolyticus</i> | FIS, AMP, FAZ      | 0.096 |
|    |                                        | 14691/2021-2 | <i>V. alginolyticus</i>    | AMP                |       |
| 10 | <i>Mytilus galloprovincialis</i>       | 21171/2021-1 | <i>V. alginolyticus</i>    | FIS, AMP, PIP, FAZ | 0.129 |
|    |                                        | 17062/2022-1 | <i>V. alginolyticus</i>    | FIS, AMP, PIP, FAZ | 0.129 |
|    |                                        | 21252/2022-1 | <i>V. parahaemolyticus</i> | FIS, AMP, FAZ      | 0.096 |
|    |                                        | 25215/2022-1 | <i>V. parahaemolyticus</i> | FIS, AMP, PIP, FAZ | 0.129 |
|    | <i>Crassostrea gigas</i>               | 26981/2021-1 | <i>V. alginolyticus</i>    | FEP                |       |
| 11 |                                        | 13873/2022-1 | <i>V. harveyi</i>          | AMP                |       |
|    | <i>Mytilus galloprovincialis</i>       | 22158/2022-1 | <i>V. vulnificus</i>       | FIS, FAZ           | 0.064 |
|    |                                        | 15516/2021-1 | <i>V. alginolyticus</i>    | FIS, AMP, FAZ      | 0.096 |
|    | <i>Mytilus galloprovincialis</i>       | 19847/2021-1 | <i>V. alginolyticus</i>    | AMP, FAZ           | 0.064 |
| 12 |                                        | 21259/2021-1 | <i>V. alginolyticus</i>    | FIS, AMP, FAZ      | 0.096 |
|    |                                        | 24139/2021-1 | <i>V. alginolyticus</i>    | SXT, AMP           | 0.064 |
|    |                                        | 24966/2021-1 | <i>V. alginolyticus</i>    | AMP, PIP           | 0.064 |
|    |                                        | 12811/2022-1 | <i>V. alginolyticus</i>    | FIS, AMP, FAZ      | 0.096 |
|    |                                        | 13874/2022-2 | <i>V. alginolyticus</i>    | FIS, AMP           | 0.064 |
|    | <i>Acanthocardia tuberculata</i>       | 17488/2022-1 | <i>V. alginolyticus</i>    | FIS, AMP, FAZ      | 0.096 |
| 15 |                                        | 22613/2022-1 | <i>V. cholerae</i>         | FIS, FAZ           | 0.064 |
|    |                                        | 23090/2022-1 | <i>V. parahaemolyticus</i> | FIS, FAZ           | 0.064 |
|    | <i>Acanthocardia tuberculata</i>       | 17490/2022-1 | <i>V. alginolyticus</i>    | AMP, PIP           | 0.064 |
| 16 |                                        | 22226/2022-1 | <i>V. parahaemolyticus</i> | FIS, AMP, FAZ      | 0.096 |
|    |                                        | 23093/2022-1 | <i>V. parahaemolyticus</i> | FIS, FAZ           | 0.064 |
| 17 | <i>Acanthocardia tuberculata</i>       | 17491/2022-1 | <i>V. alginolyticus</i>    | AMP, PIP, FAZ      | 0.096 |
|    |                                        | 14076/2021-1 | <i>V. alginolyticus</i>    | FIS, AMP, FAZ      | 0.096 |
|    | <i>Venus gallina/ Chamelea gallina</i> | 17566/2021-1 | <i>V. alginolyticus</i>    | SXT, AMP, PIP      | 0.096 |
| 18 |                                        | 21064/2021-1 | <i>V. alginolyticus</i>    | FIS, AMP           | 0.064 |
|    |                                        | 21064/2021-2 | <i>V. alginolyticus</i>    | FIS, AMP           | 0.064 |
|    |                                        | 17030/2022-1 | <i>V. alginolyticus</i>    | FIS, AMP, PIP, FAZ | 0.129 |
|    |                                        | 14077/2021-1 | <i>V. alginolyticus</i>    | AMP, FAZ           | 0.064 |
|    |                                        | 21063/2021-1 | <i>V. alginolyticus</i>    | FIS, AMP, FAZ      | 0.096 |
|    |                                        | 22996/2021-1 | <i>V. harveyi</i>          | AMP, PIP           | 0.064 |
|    | <i>Venus gallina/ Chamelea gallina</i> | 25306/2021-1 | <i>V. alginolyticus</i>    | FIS, AMP           | 0.064 |
| 19 |                                        | 26424/2021-1 | <i>V. alginolyticus</i>    | AMP, FAZ           | 0.064 |
|    |                                        | 27490/2021-1 | <i>V. alginolyticus</i>    | –                  |       |
|    |                                        | 28792/2021-1 | <i>V. alginolyticus</i>    | AMP, PIP           | 0.064 |
|    |                                        | 33798/2021-1 | <i>V. harveyi</i>          | –                  |       |
|    |                                        | 10739/2022-1 | <i>V. alginolyticus</i>    | FIS, AMP           | 0.064 |
|    |                                        | 17038/2022-1 | <i>V. alginolyticus</i>    | FIS, AMP, PIP, FAZ | 0.129 |
|    |                                        | 14078/2021-1 | <i>V. alginolyticus</i>    | AMP, FAZ           | 0.064 |
|    | <i>Venus gallina/ Chamelea gallina</i> | 19483/2021-1 | <i>V. alginolyticus</i>    | FIS, AMP           | 0.064 |
| 20 |                                        | 25309/2021-1 | <i>V. alginolyticus</i>    | FIS, AMP, PIP, FAZ | 0.129 |
|    |                                        | 26425/2021-1 | <i>V. alginolyticus</i>    | AMP                |       |
|    |                                        | 10742/2022-1 | <i>V. alginolyticus</i>    | FIS, AMP, FAZ      | 0.096 |
|    | <i>Venus gallina/ Chamelea gallina</i> | 16579/2021-1 | <i>V. alginolyticus</i>    | FIS, SXT, AMP      | 0.096 |
| 21 |                                        | 18687/2021-1 | <i>V. alginolyticus</i>    | FIS, AMP, PIP      | 0.096 |

|                    |                                            |              |                            |                         |       |
|--------------------|--------------------------------------------|--------------|----------------------------|-------------------------|-------|
| 22                 | <i>Venus gallina/<br/>Chamelea gallina</i> | 22986/2021-1 | <i>V. parahaemolyticus</i> | AMP, FAZ                | 0.064 |
|                    |                                            | 22986/2021-2 | <i>V. alginolyticus</i>    | FIS, AMP, PIP, FAZ      | 0.129 |
|                    |                                            | 16588/2021-1 | <i>V. harveyi</i>          | FIS, AMP, PIP, FAZ      | 0.129 |
|                    |                                            | 18696/2021-1 | <i>V. parahaemolyticus</i> | FIS, AMP, PIP, FAZ      | 0.129 |
|                    |                                            | 21611/2021-1 | <i>V. alginolyticus</i>    | AMP, PIP, FAZ           | 0.096 |
|                    |                                            | 22989/2021-1 | <i>V. alginolyticus</i>    | AMP, FAZ                | 0.064 |
|                    |                                            | 27065/2021-1 | <i>V. alginolyticus</i>    | FIS, AMP, PIP, FAZ      | 0.129 |
| Various<br>origins | <i>Chlamis operculatis</i>                 | 16677/2021-1 | <i>V. alginolyticus</i>    | AMP                     |       |
|                    |                                            | 16677/2021-2 | <i>V. alginolyticus</i>    | AMP                     |       |
|                    | <i>Modiolus barbatus</i>                   | 19490/2021-1 | <i>V. alginolyticus</i>    | FIS, AMP, PIP, FAZ      | 0.129 |
|                    | <i>Mytilus<br/>galloprovincialis</i>       | 9578/2021-1  | <i>V. alginolyticus</i>    | FIS, AMP, FAZ           | 0.096 |
|                    |                                            | 13421/2021-1 | <i>V. harveyi</i>          | FIS, AMP, FAZ           | 0.096 |
|                    |                                            | 13652/2021-1 | <i>V. alginolyticus</i>    | AMP                     |       |
|                    |                                            | 14537/2021-1 | <i>V. harveyi</i>          | AMP                     |       |
|                    |                                            | 16199/2021-1 | <i>V. alginolyticus</i>    | FIS, AMP                | 0.064 |
|                    |                                            | 16199/2021-2 | <i>V. alginolyticus</i>    | AMP                     |       |
|                    |                                            | 16365/2021-2 | <i>V. alginolyticus</i>    | AMP                     |       |
|                    |                                            | 16827/2021-1 | <i>V. alginolyticus</i>    | FIS, AMP, FAZ           | 0.096 |
|                    |                                            | 16827/2021-2 | <i>V. alginolyticus</i>    | FIS, AMP                | 0.064 |
|                    |                                            | 17417/2021-1 | <i>V. alginolyticus</i>    | FIS                     |       |
|                    |                                            | 18643/2021-1 | <i>V. alginolyticus</i>    | FIS, SXT, AMP, PIP, FAZ | 0.161 |
|                    |                                            | 18821/2021-1 | <i>V. alginolyticus</i>    | FIS, AMP, PIP, FAZ      | 0.129 |
|                    |                                            | 19487/2021-1 | <i>V. alginolyticus</i>    | FIS, AMP, PIP, FAZ      | 0.129 |
|                    |                                            | 19852/2021-1 | <i>V. alginolyticus</i>    | FIS, AMP, PIP, FAZ      | 0.129 |
|                    |                                            | 19945/2021-1 | <i>V. alginolyticus</i>    | FIS, AMP, PIP, FAZ      | 0.129 |
|                    |                                            | 20008/2021-1 | <i>V. alginolyticus</i>    | FIS, AMP, PIP           | 0.096 |
|                    |                                            | 21015/2021-1 | <i>V. alginolyticus</i>    | FIS, AMP, FAZ           | 0.096 |
|                    |                                            | 21957/2021-1 | <i>V. alginolyticus</i>    | FIS, AMP, PIP           | 0.096 |
|                    |                                            | 22015/2021-1 | <i>V. alginolyticus</i>    | AMP, PIP, FAZ           | 0.096 |
|                    |                                            | 25101/2021-1 | <i>V. harveyi</i>          | –                       |       |
|                    | <i>Venus gallina/<br/>Chamelea gallina</i> | 21062/2021-1 | <i>V. alginolyticus</i>    | AMP                     |       |

Various origin: samples collected from purification and dispatch centres or at retail as part of official control. MERO: meropenem; FIS: sulfisoxazole; SXT: trimethoprim/sulfamethoxazole; AMP: ampicillin; P/T4: piperacillin/tazobactam constant 4; PIP: piperacillin; FAZ: cefazolin; A/S2: ampicillin/sulbactam; TAZ: ceftazidime; FEP cefepime.

**Table S2.** Results for the broth microdilution assays of *Vibrio* isolates.

| ID CEPPPO    | Specie           | FO | AZ  | CH | TE | AX | AUG | CIP | GE  | NA | MER | FIS  | SXT      | AM | ST | AM | P/T4 | TG | TIM2 | LEV | NIT | DO | MI | ET | IM | PIP | FA | TO | TA | A/S2 | AZ | FE |   |
|--------------|------------------|----|-----|----|----|----|-----|-----|-----|----|-----|------|----------|----|----|----|------|----|------|-----|-----|----|----|----|----|-----|----|----|----|------|----|----|---|
|              |                  | X  | I   | L  | T  | O  | 2   |     | N   | L  | O   |      |          | P  | R  | I  |      | C  |      | O   |     | R  | N  | P  | I  |     | Z  | B  | Z  |      | T  | P  |   |
| 3891/2021-1  | V. harveyi       | 2  | —   | —  | —  | —  | 2/1 | 0,2 | 2   | 2  | —   | —    | —        | 32 | 16 | —  | —    | —  | —    | -   | —   | -  | -  | -  | -  | 64  | -  | -  | -  | -    | 2  | -  |   |
|              |                  |    |     |    |    |    |     | 5   |     |    |     |      |          |    |    |    |      |    |      |     |     |    |    |    |    |     |    |    |    |      |    |    |   |
| 9578/2021-1  | V. alginolyticus | 4  | —   | —  | —  | —  | 4/2 | —   | 1   | —  | —   |      | —        | 32 | 16 | —  | —    | —  | —    | —   | —   | —  | -  | -  | 8  | -   | 16 | -  | -  | -    | -  | -  | - |
|              |                  |    |     |    |    |    |     |     |     |    |     | >256 |          |    |    |    |      |    |      |     |     |    |    |    |    |     |    |    |    |      |    |    |   |
| 13421/2021-1 | V. harveyi       | 4  | 4   | —  | —  | —  | —   | 0,1 | 1   | —  | —   |      | —        | 32 | 16 | —  | —    | —  | —    | —   | —   | —  | —  | —  | -  | 64  | 16 | -  | -  | -    | 8  | -  |   |
|              |                  |    |     |    |    |    |     | 2   |     |    |     | >256 |          |    |    |    |      |    |      |     |     |    |    |    |    |     |    |    |    |      |    |    |   |
| 13652/2021-1 | V. alginolyticus | 2  | —   | —  | —  | —  | —   | —   | 0,5 | 16 | —   | 64   | —        | 32 | 4  | —  | —    | —  | —    | —   | —   | —  | -  | -  | -  | -   | 4  | -  | -  | -    | -  | -  | - |
| 14076/2021-1 | V. alginolyticus | 8  | 1   | —  | —  | —  | 8/4 | 0,5 | 1   | 1  | —   |      | 0,25/4,7 | 32 | 16 | —  | —    | —  | 64/2 | —   | —   | —  | -  | -  | -  | 64  | 16 | -  | -  | 8/4  | 2  | -  |   |
|              |                  |    |     |    |    |    |     |     |     |    |     | >256 | 5        |    |    |    |      |    |      |     |     |    |    |    |    |     |    |    |    |      |    |    |   |
| 14077/2021-1 | V. alginolyticus | 4  | 2   | —  | —  | —  | —   | 0,2 | 2   | 1  | —   | 128  | —        | 32 | 8  | —  | —    | —  | 64/2 | —   | —   | —  | -  | -  | -  | 64  | 16 | -  | -  | 8/4  | 16 | -  |   |
|              |                  |    |     |    |    |    |     | 5   |     |    |     |      |          |    |    |    |      |    |      |     |     |    |    |    |    |     |    |    |    |      |    |    |   |
| 14078/2021-1 | V. alginolyticus | 4  | —   | —  | —  | —  | 4/2 | 0,1 | 1   | 1  | —   | 64   | —        | 32 | 8  | —  | —    | —  | —    | —   | —   | —  | -  | -  | -  | -   | 8  | -  | -  | -    | 2  | -  |   |
|              |                  |    |     |    |    |    |     | 2   |     |    |     |      |          |    |    |    |      |    |      |     |     |    |    |    |    |     |    |    |    |      |    |    |   |
| 14537/2021-1 | V. harveyi       | 2  | —   | —  | —  | —  | —   | —   | 1   | 1  | —   | —    | —        | 32 | 8  | —  | —    | —  | —    | —   | —   | —  | -  | -  | -  | 64  | -  | -  | -  | -    | 4  | -  |   |
| 14651/2021-1 | V. harveyi       | 1  | 0,5 | —  | —  | —  | —   | 0,1 | 1   | -  | —   | —    | —        | 32 | 8  | —  | —    | —  | —    | —   | —   | —  | -  | -  | -  | 64  | 2  | -  | -  | -    | 2  | -  |   |
|              |                  |    |     |    |    |    |     | 2   |     |    |     |      |          |    |    |    |      |    |      |     |     |    |    |    |    |     |    |    |    |      |    |    |   |
| 14662/2021-1 | V. alginolyticus | 4  | —   | —  | —  | —  | 2/1 | 0,0 | 0,5 | 1  | —   |      | 0,25/4,7 | 32 | 8  | —  | —    | —  | —    | —   | —   | —  | -  | -  | -  | 64  | 8  | -  | -  | -    | -  | -  |   |
|              |                  |    |     |    |    |    |     | 6   |     |    |     | >256 | 5        |    |    |    |      |    |      |     |     |    |    |    |    |     |    |    |    |      |    |    |   |
| 14672/2021-1 | V. alginolyticus | 8  | —   | —  | —  | —  | 2/1 | 0,1 | 1   | -  | —   | —    | —        | 32 | 32 | —  | —    | —  | —    | —   | —   | —  | -  | -  | -  | 64  | 4  | -  | -  | -    | -  | -  |   |
|              |                  |    |     |    |    |    |     | 2   |     |    |     |      |          |    |    |    |      |    |      |     |     |    |    |    |    |     |    |    |    |      |    |    |   |

[illegible]

|                  |                            |   |   |   |   |   |     |             |     |   |   |      |      |    |    |   |   |      |      |   |   |   |   |   |   |         |    |    |   |      |   |   |
|------------------|----------------------------|---|---|---|---|---|-----|-------------|-----|---|---|------|------|----|----|---|---|------|------|---|---|---|---|---|---|---------|----|----|---|------|---|---|
| 16677/2021-<br>2 | <i>V. alginolyticus</i>    | 2 | — | — | — | — | 4/2 | 0,2<br>5    | 1   | 2 | — | 128  | —    | 32 | 8  | — | — | —    | —    | — | — | — | — | — | — | 64      | 4  | —  | — | —    | — | — |
| 16827/2021-<br>1 | <i>V. alginolyticus</i>    | 4 | — | — | — | — | 4/2 | 0,1<br>2    | —   | 2 | — | >256 | —    | 32 | 4  | — | — | —    | —    | — | — | — | — | — | — | 64      | 8  | —  | — | —    | — | — |
| 16827/2021-<br>2 | <i>V. alginolyticus</i>    | 2 | — | — | — | — | —   | 0,2<br>5    | 0,5 | 2 | — | >256 | —    | 32 | 16 | — | — | —    | —    | — | — | — | — | — | — | 64      | 4  | —  | — | 8/4  | 2 | — |
| 17417/2021-<br>1 | <i>V. alginolyticus</i>    | 2 | — | — | — | — | —   | 0,0<br>6    | —   | 2 | — | >256 | —    | 8  | 8  | — | — | —    | —    | — | — | — | — | — | — | —       | 4  | —  | — | —    | — | — |
| 17566/2021-<br>1 | <i>V. alginolyticus</i>    | 1 | — | — | — | — | 8/4 | 0,2<br>5    | 1   | 2 | — | 64   | 4/76 | 32 | 16 | — | — | —    | 16/2 | — | — | — | — | — | — | ><br>64 | 4  | —  | — | —    | 2 | — |
| 17571/2021-<br>1 | <i>V. alginolyticus</i>    | 4 | — | — | — | — | 4/2 | —<br>>256   | 0,5 | — | — | —    | 32   | 8  | —  | — | — | —    | —    | — | — | — | — | — | — | ><br>64 | 8  | —  | — | —    | 4 | — |
| 17571/2021-<br>2 | <i>V. alginolyticus</i>    | 2 | — | — | — | — | 4/2 | 0,0<br>6    | 0,5 | 1 | — | 64   | —    | 32 | 8  | — | — | —    | —    | — | — | — | — | — | — | ><br>64 | 8  | —  | — | —    | — | — |
| 17633/2021-<br>1 | <i>V. alginolyticus</i>    | 8 | — | — | — | — | 8/4 | —<br>>256   | 1   | — | — | —    | 32   | 8  | —  | — | — | 64/2 | —    | — | — | — | — | — | — | ><br>64 | 8  | —  | — | 8/4  | 2 | — |
| 18643/2021-<br>1 | <i>V. alginolyticus</i>    | 4 | — | — | — | — | 8/4 | —<br>>256   | 1   | 1 | — | —    | 4/76 | 32 | 8  | — | — | —    | —    | — | — | — | — | — | — | ><br>64 | 8  | >8 | — | —    | — | — |
| 18687/2021-<br>1 | <i>V. alginolyticus</i>    | 4 | — | — | 4 | — | 4/2 | 0,1<br>>256 | 0,5 | 2 | — | —    | 32   | 8  | —  | — | — | —    | —    | — | — | — | — | — | — | ><br>64 | 4  | —  | — | —    | — | — |
| 18696/2021-<br>1 | <i>V. parahaemolyticus</i> | 8 | — | — | — | — | —   | —<br>>256   | 1   | — | — | —    | 32   | 16 | —  | — | — | —    | —    | — | — | — | — | — | — | ><br>64 | 8  | —  | — | —    | 2 | — |
| 18821/2021-<br>1 | <i>V. alginolyticus</i>    | 4 | — | — | — | — | 8/4 | 0,2<br>>256 | 2   | — | — | —    | 32   | 8  | —  | — | — | —    | —    | — | — | — | — | — | — | ><br>64 | 8  | —  | — | 16/8 | 2 | — |
| 19483/2021-<br>1 | <i>V. alginolyticus</i>    | 4 | — | — | — | — | 4/2 | 0,2<br>>256 | 1   | 2 | — | —    | 32   | 8  | —  | — | — | —    | —    | — | — | — | — | — | — | 32      | 4  | —  | — | —    | — | — |
| 19487/2021-<br>1 | <i>V. alginolyticus</i>    | 8 | — | — | — | — | 8/4 | 0,1<br>>256 | 0,5 | — | — | —    | 32   | 4  | —  | — | 8 | —    | —    | — | — | — | — | — | — | ><br>64 | 16 | —  | 8 | —    | 2 | — |

|              |                            |    |   |   |   |   |      |     |     |   |   |      |      |    |    |   |   |       |      |   |   |   |   |   |   |    |    |    |   |   |      |    |   |
|--------------|----------------------------|----|---|---|---|---|------|-----|-----|---|---|------|------|----|----|---|---|-------|------|---|---|---|---|---|---|----|----|----|---|---|------|----|---|
| 19490/2021-1 | <i>V. alginolyticus</i>    | 4  | — | — | — | — | 8/4  | 0,1 | 0,5 | 2 | — |      | —    | 32 | 8  | — | — | —     | —    | — | — | — | — | — | — | >  | 8  | —  | — | — | 2    | —  |   |
|              |                            |    |   |   |   |   |      | 2   |     |   |   | >256 |      |    |    |   |   |       |      |   |   |   |   |   |   | 64 |    |    |   |   |      |    |   |
| 19847/2021-1 | <i>V. alginolyticus</i>    | 4  | — | — | — | — | —    | -   | —   | - | — | 64   | —    | 32 | -  | — | — | —     | —    | — | — | — | — | — | - | -  | 8  | —  | — | — | -    | -  |   |
| 19852/2021-1 | <i>V. alginolyticus</i>    | 8  | — | — | — | — | 8/4  | 0,2 | 2   | 1 | — |      | —    | 32 | 8  | — | — | —     |      | — | — | — | — | — | - | -  | >  | 16 | — | — | —    | 2  | — |
|              |                            |    |   |   |   |   |      | 5   |     |   |   | >256 |      |    |    |   |   | >64/2 |      |   |   |   |   |   |   |    | 64 |    |   |   |      |    |   |
| 19945/2021-1 | <i>V. alginolyticus</i>    | 2  | — | — | — | — | 2/1  | 0,1 | —   | 2 | — |      | —    | 32 | 8  | — | — | —     | —    | — | — | — | — | — | - | -  | >  | 8  | — | — | —    | -  | - |
|              |                            |    |   |   |   |   |      | 2   |     |   |   | >256 |      |    |    |   |   |       |      |   |   |   |   |   |   |    | 64 |    |   |   |      |    |   |
| 20008/2021-1 | <i>V. alginolyticus</i>    | 4  | — | — | — | — | —    | 0,1 | 0,5 | - | — |      | —    | 32 | 8  | — | — | —     | —    | — | — | — | — | — | - | -  | >  | 4  | — | — | —    | -  | - |
|              |                            |    |   |   |   |   |      | 2   |     |   |   | >256 |      |    |    |   |   |       |      |   |   |   |   |   |   |    | 64 |    |   |   |      |    |   |
| 20312/2021-1 | <i>V. harveyi</i>          | -  | — | — | — | — | —    | —   | —   | — | — | —    | —    | —  | —  | — | — | —     | —    | — | — | — | — | — | - | -  | -  | -  | - | - | -    | -  | - |
| 20656/2021-1 | <i>V. alginolyticus</i>    | -  | — | — | — | — | 4/2  | —   | —   | — | — |      | 4/76 | 32 | 4  | — | — | —     | —    | — | — | — | — | — | - | -  | >  | 8  | — | — | —    | -  | - |
|              |                            |    |   |   |   |   |      |     |     |   |   | >256 |      |    |    |   |   |       |      |   |   |   |   |   |   |    | 64 |    |   |   |      |    |   |
| 20657/2021-1 | <i>V. alginolyticus</i>    | 4  | — | — | — | — | —    | 0,0 | 0,5 | — | — | —    | —    | 32 | 8  | — | — | —     | —    | — | — | — | — | — | - | -  | >  | -  | — | — | —    | -  | - |
|              |                            |    |   |   |   |   |      | 6   |     |   |   |      |      |    |    |   |   |       |      |   |   |   |   |   |   |    | 64 |    |   |   |      |    |   |
| 20657/2021-2 | <i>V. harveyi</i>          | 2  | — | — | — | — | —    | —   | 1   | — | — | 128  | —    | 32 | 16 | — | — | —     | —    | — | — | — | — | — | - | -  | -  | 2  | — | — | —    | 2  | — |
| 20658/2021-1 | <i>V. parahaemolyticus</i> | 16 | — | — | — | — | 16/8 | 0,2 | 2   | 2 | — | 256  | —    | 32 | 8  | — | — | —     |      | — | — | — | — | — | - | -  | >  | 8  | — | — | 8/4  | 2  | — |
|              |                            |    |   |   |   |   |      | 5   |     |   |   |      |      |    |    |   |   | >64/2 |      |   |   |   |   |   |   |    | 64 |    |   |   |      |    |   |
| 21015/2021-1 | <i>V. alginolyticus</i>    | 8  | — | — | — | — | 2/1  | 0,0 | 1   | 1 | — |      | —    | 32 | -  | — | — | —     | —    | — | — | — | — | — | - | -  | -  | 16 | — | 2 | —    | 2  | — |
|              |                            |    |   |   |   |   |      | 6   |     |   |   | >256 |      |    |    |   |   |       |      |   |   |   |   |   |   |    |    |    |   |   |      |    |   |
| 21062/2021-1 | <i>V. alginolyticus</i>    | 2  | — | — | — | — | —    | 0,1 | 0,5 | 2 | — | 64   | —    | 32 | 8  | — | — | —     | —    | — | — | — | — | — | - | -  | -  | 2  | — | — | 16/8 | -  | - |
|              |                            |    |   |   |   |   |      | 2   |     |   |   |      |      |    |    |   |   |       |      |   |   |   |   |   |   |    |    |    |   |   |      |    |   |
| 21063/2021-1 | <i>V. alginolyticus</i>    | 8  | — | — | — | — | 8/4  | 0,2 | 4   | 1 | — |      | —    | 32 | 32 | — | — | —     | 64/2 | — | — | — | — | — | - | -  | 64 | 8  | — | — | —    | 2  | — |
|              |                            |    |   |   |   |   |      | 5   |     |   |   | >256 |      |    |    |   |   |       |      |   |   |   |   |   |   |    |    |    |   |   |      |    |   |
| 21064/2021-1 | <i>V. alginolyticus</i>    | 8  | — | — | — | — | 16/8 | 0,5 | 2   | 1 | — |      | —    | 32 | 8  | — | — | —     | 64/2 | — | — | — | — | — | - | -  | 64 | -  | — | — | 16/8 | 16 | - |
|              |                            |    |   |   |   |   |      |     |     |   |   | >256 |      |    |    |   |   |       |      |   |   |   |   |   |   |    |    |    |   |   |      |    |   |

|              |                            |    |   |   |   |   |     |     |     |   |   |          |    |    |    |       |   |       |   |   |   |   |   |    |    |    |   |     |      |    |    |  |
|--------------|----------------------------|----|---|---|---|---|-----|-----|-----|---|---|----------|----|----|----|-------|---|-------|---|---|---|---|---|----|----|----|---|-----|------|----|----|--|
| 21064/2021-2 | <i>V. alginolyticus</i>    | 4  | — | — | — | — | 4/2 | 0,1 | 1   | 1 | — | —        | 32 | 16 | —  | —     | — | —     | — | — | — | — | — | —  | —  | —  | — | —   | —    | —  | —  |  |
|              |                            |    |   |   |   |   |     | 2   |     |   |   | >256     |    |    |    |       |   |       |   |   |   |   |   |    |    |    |   |     |      |    |    |  |
| 21168/2021-1 | <i>V. alginolyticus</i>    | 8  | — | — | — | — | 8/4 | 0,2 | 1   | 1 | — | —        | 32 | 8  | —  | —     | — | —     | — | — | — | — | — | —  | >  | 16 | — | —   | —    | 2  | —  |  |
|              |                            |    |   |   |   |   |     | 5   |     |   |   | >256     |    |    |    |       |   | >64/2 |   |   |   |   |   | 64 |    |    |   |     |      |    |    |  |
| 21169/2021-1 | <i>V. alginolyticus</i>    | 16 | — | — | — | — | 8/4 | —   | 1   | — | — | —        | 32 | 8  | —  | —     | — | 32/2  | — | — | — | — | — | —  | >  | 16 | — | —   | —    | 2  | —  |  |
|              |                            |    |   |   |   |   |     |     |     |   |   | >256     |    |    |    |       |   |       |   |   |   |   |   | 64 |    |    |   |     |      |    |    |  |
| 21169/2021-2 | <i>V. parahaemolyticus</i> | 8  | — | — | — | — | 4/2 | 0,0 | —   | — | — | 0,25/4,7 | 32 | 16 | —  | —     | — | —     | — | — | — | — | — | —  | 64 | 16 | — | —   | —    | —  | —  |  |
|              |                            |    |   |   |   |   |     | 6   |     |   |   | >256     | 5  |    |    |       |   |       |   |   |   |   |   |    |    |    |   |     |      |    |    |  |
| 21170/2021-1 | <i>V. parahaemolyticus</i> | 2  | — | — | — | — | —   | 0,1 | 2   | 1 | — | 64       | —  | 32 | 16 | —     | — | —     | — | — | — | — | — | —  | —  | —  | — | —   | —    | —  | —  |  |
|              |                            |    |   |   |   |   |     | 2   |     |   |   |          |    |    |    |       |   |       |   |   |   |   |   |    |    |    |   |     |      |    |    |  |
| 21170/2021-2 | <i>V. alginolyticus</i>    | 1  | — | — | — | — | —   | 0,0 | —   | 1 | — | —        | 2  | 8  | —  | —     | — | —     | — | — | — | — | — | —  | —  | —  | — | —   | —    | —  | —  |  |
|              |                            |    |   |   |   |   |     | 3   |     |   |   | >256     |    |    |    |       |   |       |   |   |   |   |   |    |    |    |   |     |      |    |    |  |
| 21171/2021-1 | <i>V. alginolyticus</i>    | 16 | — | — | — | — | 8/4 | 0,0 | 1   | — | — | 0,5/9,5  | 32 | 8  | —  | —     | — | —     | — | — | — | — | — | —  | >  | 16 | — | —   | 16/8 | 2  | —  |  |
|              |                            |    |   |   |   |   |     | 6   |     |   |   | >256     |    |    |    |       |   | >64/2 |   |   |   |   |   | 64 |    |    |   |     |      |    |    |  |
| 21259/2021-1 | <i>V. alginolyticus</i>    | 8  | — | — | — | — | —   | 0,1 | 0,5 | 2 | — | —        | 32 | 8  | —  | —     | — | —     | — | — | — | — | — | —  | —  | 8  | — | —   | —    | 16 | —  |  |
|              |                            |    |   |   |   |   |     | 2   |     |   |   | >256     |    |    |    |       |   |       |   |   |   |   |   |    |    |    |   |     |      |    |    |  |
| 21506/2021-1 | <i>V. alginolyticus</i>    | 1  | — | — | — | — | —   | 0,1 | 1   | 1 | 4 | —        | 32 | 8  | —  | 128/4 | — | 64/2  | — | — | — | — | 1 | 2  | >  | 4  | — | —   | —    | —  | 16 |  |
|              |                            |    |   |   |   |   |     | 2   |     |   |   | >256     |    |    |    |       |   |       |   |   |   |   |   | 64 |    |    |   |     |      |    |    |  |
| 21507/2021-1 | <i>V. alginolyticus</i>    | 4  | — | — | — | — | 8/4 | 0,0 | —   | — | — | —        | 32 | 8  | —  | —     | — | —     | — | — | — | — | — | >  | —  | —  | — | 8/4 | —    | —  | —  |  |
|              |                            |    |   |   |   |   |     | 3   |     |   |   | >256     |    |    |    |       |   | >64/2 |   |   |   |   |   | 64 |    |    |   |     |      |    |    |  |
| 21508/2021-1 | <i>V. alginolyticus</i>    | 2  | — | — | — | — | —   | 0,0 | —   | — | — | 64       | —  | 32 | 8  | —     | — | —     | — | — | — | — | — | —  | 4  | —  | — | —   | —    | —  | —  |  |
|              |                            |    |   |   |   |   |     | 6   |     |   |   |          |    |    |    |       |   |       |   |   |   |   |   |    |    |    |   |     |      |    |    |  |
| 21570/2021-1 | <i>V. alginolyticus</i>    | 8  | — | — | — | — | 4/2 | 0,1 | 1   | — | — | 32       | —  | 32 | 8  | —     | — | —     | — | — | — | — | — | >  | 16 | —  | — | —   | 2    | —  | —  |  |
|              |                            |    |   |   |   |   |     | 2   |     |   |   |          |    |    |    |       |   |       |   |   |   |   |   | 64 |    |    |   |     |      |    |    |  |
| 21611/2021-1 | <i>V. alginolyticus</i>    | 8  | — | — | — | — | 8/4 | 0,1 | 1   | 8 | — | 32       | —  | 32 | 8  | —     | — | —     | — | — | — | — | — | >  | 8  | —  | — | —   | 4    | —  | —  |  |
|              |                            |    |   |   |   |   |     | 2   |     |   |   |          |    |    |    |       |   |       |   |   |   |   |   | 64 |    |    |   |     |      |    |    |  |
| 21957/2021-1 | <i>V. alginolyticus</i>    | 4  | — | — | — | — | 8/4 | 0,0 | 1   | — | — | —        | 32 | 8  | —  | —     | — | —     | — | — | — | — | — | >  | 4  | —  | — | —   | —    | —  | —  |  |
|              |                            |    |   |   |   |   |     | 3   |     |   |   | >256     |    |    |    |       |   |       |   |   |   |   |   | 64 |    |    |   |     |      |    |    |  |



[illegible]

|              |                         |    |   |   |   |   |      |     |     |    |   |          |    |    |    |   |       |      |   |   |   |     |     |     |    |   |     |      |    |   |
|--------------|-------------------------|----|---|---|---|---|------|-----|-----|----|---|----------|----|----|----|---|-------|------|---|---|---|-----|-----|-----|----|---|-----|------|----|---|
| 25306/2021-1 | <i>V. alginolyticus</i> | 2  | - | - | - | - | 4/2  | 0,0 | -   | -  | - | -        | 32 | -  | -  | - | -     | -    | - | - | - | -   | -   | 64  | -  | - | -   | -    | -  | - |
|              |                         |    |   |   |   |   |      | 3   |     |    |   | >256     |    |    |    |   |       |      |   |   |   |     |     |     |    |   |     |      |    |   |
| 25309/2021-1 | <i>V. alginolyticus</i> | 8  | - | - | - | - | 8/4  | -   | 1   | -  | - | -        | 32 | 8  | -  | - | -     | -    | - | - | - | -   | -   | >   | 16 | - | -   | 16/8 | -  | - |
|              |                         |    |   |   |   |   |      |     |     |    |   | >256     |    |    |    |   | >64/2 |      |   |   |   |     | 64  |     |    |   |     |      |    |   |
| 25803/2021-1 | <i>V. alginolyticus</i> | -  | - | - | - | - | -    | 0,1 | 0,5 | 1  | - | 256      | -  | -  | 8  | - | -     | -    | - | - | - | -   | -   | -   | -  | - | -   | -    | -  | - |
|              |                         |    |   |   |   |   |      | 2   |     |    |   |          |    |    |    |   |       |      |   |   |   |     |     |     |    |   |     |      |    |   |
| 25806/2021-1 | <i>V. alginolyticus</i> | 8  | - | - | - | - | 4/2  | 0,0 | 0,5 | 1  | - | 32       | -  | 32 | 16 | - | -     | -    | - | - | - | -   | -   | -   | 16 | - | -   | -    | 2  | - |
|              |                         |    |   |   |   |   |      | 6   |     |    |   |          |    |    |    |   |       |      |   |   |   |     |     |     |    |   |     |      |    |   |
| 26424/2021-1 | <i>V. alginolyticus</i> | 8  | - | - | - | - | 4/2  | -   | 0,5 | -  | - | 256      | -  | 32 | 4  | - | -     | -    | - | - | - | -   | -   | 16  | -  | - | -   | 2    | -  |   |
|              |                         |    |   |   |   |   |      |     |     |    |   |          |    |    |    |   |       |      |   |   |   |     |     |     |    |   |     |      |    |   |
| 26425/2021-1 | <i>V. alginolyticus</i> | 4  | - | - | - | - | -    | 0,1 | 0,5 | 1  | - | 64       | -  | 32 | 8  | - | -     | -    | - | - | - | -   | -   | 4   | -  | - | -   | -    | -  | - |
|              |                         |    |   |   |   |   |      | 2   |     |    |   |          |    |    |    |   |       |      |   |   |   |     |     |     |    |   |     |      |    |   |
| 26755/2021-1 | <i>V. harveyi</i>       | 2  | - | - | - | - | -    | 0,1 | 2   | -  | - | 64       | -  | 32 | 8  | - | -     | -    | - | - | - | -   | -   | -   | -  | - | -   | -    | 2  |   |
|              |                         |    |   |   |   |   |      | 2   |     |    |   |          |    |    |    |   |       |      |   |   |   |     |     |     |    |   |     |      |    |   |
| 26757/2021-1 | <i>V. harveyi</i>       | 2  | - | - | - | - | -    | 0,1 | 1   | 1  | - | 32       | -  | 32 | 8  | - | -     | -    | - | - | - | -   | -   | >   | -  | - | -   | -    | -  | - |
|              |                         |    |   |   |   |   |      | 2   |     |    |   |          |    |    |    |   |       |      |   |   |   |     | 64  |     |    |   |     |      |    |   |
| 26981/2021-1 | <i>V. alginolyticus</i> | -  | - | - | - | - | -    | -   | -   | 16 | - | -        | -  | -  | -  | - | 64/4  | -    | - | - | - | -   | -   | 64  | -  | - | -   | 4    | 32 |   |
|              |                         |    |   |   |   |   |      |     |     |    |   |          |    |    |    |   |       |      |   |   |   |     |     |     |    |   |     |      |    |   |
| 27065/2021-1 | <i>V. alginolyticus</i> | 8  | - | - | - | - | 16/8 | 0,1 | 2   | 2  | - | -        | 32 | 16 | -  | - | -     | -    | - | - | - | -   | >64 | 16  | -  | - | 8/4 | -    | -  |   |
|              |                         |    |   |   |   |   |      | 2   |     |    |   | >256     |    |    |    |   | >64/2 |      |   |   |   |     |     |     |    |   |     |      |    |   |
| 27218/2021-1 | <i>V. alginolyticus</i> | 16 | - | - | - | - | 4/2  | 0,0 | 1   | -  | - | -        | 32 | 8  | -  | - | -     | -    | - | - | - | -   | >   | >16 | -  | - | 8/4 | 4    | -  |   |
|              |                         |    |   |   |   |   |      | 6   |     |    |   | >256     |    |    |    |   |       |      |   |   |   |     | 64  |     |    |   |     |      |    |   |
| 27218/2021-2 | <i>V. harveyi</i>       | 4  | 1 | - | - | - | 2/1  | 0,2 | 2   | 1  | - | 0,25/4,7 | 32 | 16 | -  | - | -     | 32/2 | - | - | - | -   | >   | 8   | -  | - | -   | 8    | -  |   |
|              |                         |    |   |   |   |   |      | 5   |     |    |   | >256     | 5  |    |    |   |       |      |   |   |   |     | 64  |     |    |   |     |      |    |   |
| 27490/2021-1 | <i>V. alginolyticus</i> | -  | - | - | - | - | -    | -   | -   | -  | - | -        | -  | -  | -  | - | -     | -    | - | - | - | 0,5 | -   | -   | -  | - | -   | -    | -  | - |
|              |                         |    |   |   |   |   |      |     |     |    |   |          |    |    |    |   |       |      |   |   |   |     |     |     |    |   |     |      |    |   |
| 28792/2021-1 | <i>V. alginolyticus</i> | 4  | - | - | 8 | - | 0,12 | 0,5 | 1   | -  | - | -        | 32 | 8  | -  | - | -     | -    | - | - | - | -   | >   | 4   | -  | - | -   | -    | -  |   |
|              |                         |    |   |   |   |   |      |     |     |    |   |          |    |    |    |   |       |      |   |   |   |     | 64  |     |    |   |     |      |    |   |

|              |                  |   |     |   |   |   |     |     |     |   |   |      |          |    |    |    |   |   |       |   |     |   |   |    |    |   |   |   |   |   |   |
|--------------|------------------|---|-----|---|---|---|-----|-----|-----|---|---|------|----------|----|----|----|---|---|-------|---|-----|---|---|----|----|---|---|---|---|---|---|
| 33798/2021-1 | V. harveyi       | 4 | -   | - | - | - | -   | 0,2 | 1   | - | - | -    | -        | 4  | 8  | -  | - | - | -     | - | -   | - | - | -  | -  | - | - | - | - | 4 | - |
|              |                  |   |     |   |   |   |     | 5   |     |   |   |      |          |    |    |    |   |   |       |   |     |   |   |    |    |   |   |   |   |   |   |
| 37738/2021-1 | V. harveyi       | - | -   | - | - | - | -   | -   | -   | - | - | -    | -        | -  | -  | -  | - | - | -     | - | -   | - | - | -  | -  | - | - | - | - | - | - |
| 37739/2021-1 | V. alginolyticus | 8 | -   | - | - | - | 4/2 | -   | 2   | - | - |      | -        | 32 | 16 | -  | - | - | -     | - | -   | - | - | -  | -  | 8 | - | - | - | - | - |
|              |                  |   |     |   |   |   |     |     |     |   |   | >256 |          |    |    |    |   |   |       |   |     |   |   |    |    |   |   |   |   |   |   |
| 37739/2021-2 | V. harveyi       | - | -   | - | - | - | -   | -   | -   | - | - | -    | -        | -  | -  | -  | - | - | -     | - | -   | - | - | -  | -  | 4 | - | - | - | - | - |
| 10739/2022-1 | V. alginolyticus | 4 | -   | - | - | - | 2/1 | 0,1 | 0,5 | 1 | - |      | -        | 32 | 8  | -  | - | - | -     | - | -   | - | - | -  | 4  | - | - | - | 2 | - |   |
|              |                  |   |     |   |   |   |     | 2   |     |   |   | >256 |          |    |    |    |   |   |       |   |     |   |   |    |    |   |   |   |   |   |   |
| 10742/2022-1 | V. alginolyticus | 8 | -   | - | 8 | - | 2/1 | 0,2 | 1   | 1 | - |      | 0,25/4,7 | 32 | 8  | -  | - | - | -     | - | -   | - | - | 32 | 8  | - | - | - | 2 | - |   |
|              |                  |   |     |   |   |   |     | 5   |     |   |   | >256 | 5        |    |    |    |   |   |       |   |     |   |   |    |    |   |   |   |   |   |   |
| 12811/2022-1 | V. alginolyticus | 8 | -   | - | - | - | 2/1 | 0,1 | 1   | 1 | - |      | -        | 32 | 8  | -  | - | - |       | - | -   | 2 | - | -  | -  | 8 | - | - | - | 4 | - |
|              |                  |   |     |   |   |   |     | 2   |     |   |   | >256 |          |    |    |    |   |   | >64/2 |   | >64 |   |   |    |    |   |   |   |   |   |   |
| 13873/2022-1 | V. harveyi       | 8 | 0,5 | - | - | - | 2/1 | 0,2 | 2   | 1 | - |      | 256      | -  | 32 | 32 | - | - | -     | - | -   | - | - | 32 | 4  | - | - | - | 2 | - |   |
|              |                  |   |     |   |   |   |     | 5   |     |   |   |      |          |    |    |    |   |   |       |   |     |   |   |    |    |   |   |   |   |   |   |
| 13874/2022-2 | V. alginolyticus | 4 | -   | - | - | - | 2/1 | 0,1 | 1   | 1 | - |      | -        | 32 | 8  | -  | - | - | -     | - | -   | - | - | -  | 4  | - | - | - | 2 | - |   |
|              |                  |   |     |   |   |   |     | 2   |     |   |   | >256 |          |    |    |    |   |   |       |   |     |   |   |    |    |   |   |   |   |   |   |
| 16922/2022-2 | V. alginolyticus | 4 | -   | - | - | - | 4/2 | 0,2 | 0,5 | 1 | - |      | 64       | -  | 32 | 8  | - | - | -     | - | -   | - | - | -  | 4  | - | - | - | - | - | - |
|              |                  |   |     |   |   |   |     | 5   |     |   |   |      |          |    |    |    |   |   |       |   |     |   |   |    |    |   |   |   |   |   |   |
| 17030/2022-1 | V. alginolyticus | 8 | -   | - | - | - | 4/2 | 0,1 | 2   | 1 | - |      | 0,25/4,7 | 32 | 32 | -  | - | - | -     | - | -   | - | - | -  | >  | 8 | - | - | - | - | - |
|              |                  |   |     |   |   |   |     | 2   |     |   |   | >256 | 5        |    |    |    |   |   |       |   |     |   |   |    | 64 |   |   |   |   |   |   |
| 17038/2022-1 | V. alginolyticus | 8 | 0,5 | - | - | - | 4/2 | 0,2 | 1   | 1 | - |      | -        | 32 | 8  | -  | - | - | -     | - | -   | - | - | -  | >  | 8 | - | - | - | 2 | - |
|              |                  |   |     |   |   |   |     | 5   |     |   |   | >256 |          |    |    |    |   |   |       |   |     |   |   |    | 64 |   |   |   |   |   |   |
| 17062/2022-1 | V. alginolyticus | 8 | 0,5 | - | - | - | 4/2 | 0,1 | -   | 2 | - |      | 0,25/4,7 | 32 | 8  | -  | - | - | -     | - | -   | - | - | -  | >  | 8 | - | - | - | 2 | - |
|              |                  |   |     |   |   |   |     | 2   |     |   |   | >256 | 5        |    |    |    |   |   |       |   |     |   |   |    | 64 |   |   |   |   |   |   |
| 17187/2022-1 | V. alginolyticus | 4 | 0,5 | - | - | - | 4/2 | 0,1 | 0,5 | 1 | - |      | 0,25/4,7 | 32 | 8  | -  | - | - | -     | - | -   | - | - | -  | 4  | - | - | - | - | - | - |
|              |                  |   |     |   |   |   |     | 2   |     |   |   | >256 | 5        |    |    |    |   |   |       |   |     |   |   |    |    |   |   |   |   |   |   |

|              |                            |    |      |   |   |     |     |     |     |   |      |     |          |    |    |    |   |   |      |   |   |   |   |   |     |    |     |    |   |   |   |   |   |
|--------------|----------------------------|----|------|---|---|-----|-----|-----|-----|---|------|-----|----------|----|----|----|---|---|------|---|---|---|---|---|-----|----|-----|----|---|---|---|---|---|
| 17488/2022-1 | <i>V. alginolyticus</i>    | 8  | —    | — | — | —   | 8/4 | 0,1 | 0,5 | 1 | —    | —   | 32       | 16 | —  | —  | — | — | —    | — | — | — | — | — | —   | 8  | —   | —  | — | 2 | — |   |   |
|              |                            |    |      |   |   |     |     | 2   |     |   | >256 |     |          |    |    |    |   |   |      |   |   |   |   |   |     |    |     |    |   |   |   |   |   |
| 17490/2022-1 | <i>V. alginolyticus</i>    | 8  | —    | — | — | —   | 4/2 | 0,1 | 1   | 1 | —    | 64  | —        | 32 | 8  | —  | — | — | —    | — | — | — | — | — | —   | >  | 4   | —  | — | — | — | — |   |
|              |                            |    |      |   |   |     |     | 2   |     |   |      |     |          |    |    |    |   |   |      |   |   |   |   |   | 64  |    |     |    |   |   |   |   |   |
| 17491/2022-1 | <i>V. alginolyticus</i>    | 8  | —    | — | — | —   | 4/2 | 0,1 | 0,5 | 1 | —    | 64  | —        | 32 | 8  | —  | — | — | 16/2 | — | — | — | — | — | —   | >  | 8   | —  | — | — | 2 | — |   |
|              |                            |    |      |   |   |     |     | 2   |     |   |      |     |          |    |    |    |   |   |      |   |   |   |   |   | 64  |    |     |    |   |   |   |   |   |
| 19361/2022-1 | <i>V. parahaemolyticus</i> | 4  | 0,25 | — | — | 0,5 | —   | —   | 1   | — | —    | -   | 0,25/4,7 | —  | 8  | —  | — | 2 | 32/2 | 2 | — | — | — | — | 0,5 | -  | -   | 16 | — | — | — | — |   |
|              |                            |    |      |   |   |     |     |     |     |   |      |     | 5        |    |    |    |   |   |      |   |   |   |   |   |     |    |     |    |   |   |   |   |   |
| 20616/2022-1 | <i>V. parahaemolyticus</i> | 8  | 0,5  | — | — | —   | 8/4 | 0,1 | 2   | 1 | —    | —   | 0,25/4,7 | 32 | 32 | —  | — | - | 16/2 | - | — | — | — | — | —   | >  | >16 | —  | — | — | 4 | — |   |
|              |                            |    |      |   |   |     |     | 2   |     |   | >256 | 5   |          |    |    |    |   |   |      |   |   |   |   |   | 64  |    |     |    |   |   |   |   |   |
| 21249/2022-1 | <i>V. parahaemolyticus</i> | 8  | —    | — | — | —   | —   | 0,1 | 1   | 1 | —    | —   | —        | 32 | 16 | —  | — | — | —    | — | — | — | — | — | -   | -  | 16  | —  | — | — | 2 | — |   |
|              |                            |    |      |   |   |     |     | 2   |     |   | >256 |     |          |    |    |    |   |   |      |   |   |   |   |   |     |    |     |    |   |   |   |   |   |
| 21250/2022-1 | <i>V. parahaemolyticus</i> | 4  | —    | — | — | —   | 2/1 | -   | 0,5 | — | —    | 128 | —        | 16 | 8  | —  | — | — | —    | — | — | — | — | — | -   | -  | 8   | —  | — | — | 2 | — |   |
|              |                            |    |      |   |   |     |     |     |     |   |      |     |          |    |    |    |   |   |      |   |   |   |   |   |     |    |     |    |   |   |   |   |   |
| 21252/2022-1 | <i>V. parahaemolyticus</i> | 4  | —    | — | — | —   | 2/1 | 0,0 | 1   | — | —    | —   | —        | 32 | 8  | —  | — | — | —    | — | — | — | — | — | -   | -  | 32  | 16 | — | — | — | 2 | — |
|              |                            |    |      |   |   |     |     | 6   |     |   | >256 |     |          |    |    |    |   |   |      |   |   |   |   |   |     |    |     |    |   |   |   |   |   |
| 22158/2022-1 | <i>V. vulnificus</i>       | 16 | —    | — | — | —   | —   | —   | 4   | — | —    | —   | —        | —  | 32 | 16 | — | — | —    | — | — | — | — | — | -   | -  | 8   | 4  | — | — | 4 | — |   |
|              |                            |    |      |   |   |     |     |     |     |   | >256 |     |          |    |    |    |   |   |      |   |   |   |   |   |     |    |     |    |   |   |   |   |   |
| 22226/2022-1 | <i>V. parahaemolyticus</i> | 8  | —    | — | 8 | —   | —   | 0,0 | 2   | — | —    | —   | —        | 32 | 16 | —  | — | — | —    | — | — | — | — | — | -   | -  | 16  | —  | — | — | 2 | — |   |
|              |                            |    |      |   |   |     |     | 3   |     |   | >256 |     |          |    |    |    |   |   |      |   |   |   |   |   |     |    |     |    |   |   |   |   |   |
| 22613/2022-1 | <i>V. cholerae</i>         | 16 | —    | — | — | —   | 2/1 | —   | 1   | — | 0,12 | —   | —        | 2  | 32 | —  | — | — | —    | — | — | — | — | — | -   | -  | 1   | -  | 8 | 2 | — | — | — |
|              |                            |    |      |   |   |     |     |     |     |   | >256 |     |          |    |    |    |   |   |      |   |   |   |   |   |     |    |     |    |   |   |   |   |   |
| 23090/2022-1 | <i>V. parahaemolyticus</i> | 8  | —    | — | — | —   | —   | 0,1 | 1   | 2 | —    | —   | 0,25/4,7 | —  | 16 | —  | — | — | —    | — | — | — | — | — | -   | -  | 16  | —  | — | — | 2 | — |   |
|              |                            |    |      |   |   |     |     | 2   |     |   | >256 | 5   |          |    |    |    |   |   |      |   |   |   |   |   |     |    |     |    |   |   |   |   |   |
| 23093/2022-1 | <i>V. parahaemolyticus</i> | 8  | —    | — | — | —   | —   | 0,0 | 1   | 1 | —    | —   | 0,25/4,7 | —  | 16 | —  | — | — | —    | — | — | — | — | — | -   | -  | 16  | —  | — | — | 2 | — |   |
|              |                            |    |      |   |   |     |     | 6   |     |   | >256 | 5   |          |    |    |    |   |   |      |   |   |   |   |   |     |    |     |    |   |   |   |   |   |
| 24626/2022-1 | <i>V. parahaemolyticus</i> | 8  | —    | — | — | —   | 4/2 | 0,0 | 2   | — | —    | —   | 1/19     | 32 | 16 | —  | — | — | —    | — | — | — | — | — | -   | -  | 16  | —  | — | — | 2 | — |   |
|              |                            |    |      |   |   |     |     | 3   |     |   | >256 |     |          |    |    |    |   |   |      |   |   |   |   |   |     | 64 |     |    |   |   |   |   |   |

|             |                         |   |   |   |   |   |     |     |   |   |   |          |    |    |   |   |   |   |   |   |   |   |   |   |   |   |   |   |     |    |   |   |   |   |   |
|-------------|-------------------------|---|---|---|---|---|-----|-----|---|---|---|----------|----|----|---|---|---|---|---|---|---|---|---|---|---|---|---|---|-----|----|---|---|---|---|---|
| 24639/2022- | V.                      | 8 | — | — | — | — | 4/2 | 0,1 | 2 | 1 | — | 0,5/9,5  | 32 | 16 | — | — | — | — | — | — | — | — | — | — | — | — | — | > | >16 | —  | — | — | 2 | — |   |
| 1           | <i>parahaemolyticus</i> |   |   |   |   |   |     | 2   |   |   |   | >256     |    |    |   |   |   |   |   |   |   |   |   |   |   |   |   |   | 64  |    |   |   |   |   |   |
| 25214/2022- | V.                      | 8 | — | — | — | — | 4/2 | 0,1 | 2 | — | — | 0,25/4,7 | 32 | 16 | — | — | — | — | — | — | — | — | — | — | — | — | — | — | 16  | —  | — | — | 2 | — |   |
| 1           | <i>parahaemolyticus</i> |   |   |   |   |   |     | 2   |   |   |   | >256     | 5  |    |   |   |   |   |   |   |   |   |   |   |   |   |   |   |     |    |   |   |   |   |   |
| 25215/2022- | V.                      | 8 | — | — | — | — | 2/1 | 0,0 | 2 | 1 | — | 0,25/4,7 | 32 | 16 | — | — | — | — | — | — | — | — | — | — | — | — | — | — | >   | 16 | — | — | — | 2 | — |
| 1           | <i>parahaemolyticus</i> |   |   |   |   |   |     | 6   |   |   |   | >256     | 5  |    |   |   |   |   |   |   |   |   |   |   |   |   |   |   | 64  |    |   |   |   |   |   |

FOX: cefoxitin; AZI: azithromycin; CHL: chloramphenicol; TET: tetracycline; AXO: ceftriaxone; AUG2: amoxicillin/clavulanic acid 2:1 ratio; CIP: ciprofloxacin; GEN: gentamicin; NAL: nalidixic acid; MERO: meropenem; FIS: sulfisoxazole; SXT: trimethoprim/sulfamethoxazole; AMP: ampicillin; STR: streptomycin; AMI: amikacin; P/T4: piperacillin/tazobactam constant 4; TGC: tigecycline; TIM2 ticarcillin/clavulanic acid constant 2; LEVO: levofloxacin; NIT: nitrofurantoin; DOR: doripenem; MIN: minocycline; ETP: ertapenem; IMI: imipenem; PIP: piperacillin; FAZ: cefazolin; TOB: tobramycin; TAZ: ceftazidime; A/S2: ampicillin/sulbactam; AZT: aztreonam; FEP cefepime.
